# Supplementary material
Source: publisher site journal article supplement (https://static.cambridge.org/content/id/urn:cambridge.org:id:article:S1368980020003869/resource/name/S1368980020003869supp002.docx)
Supplement: Supplementary file 1 [file S1368980020003869supp002.docx]

Table 2. Screening test result for BMI Z-score defined thinness with MUAC among male adolescent (n=456)

| Thiness and severe thiness according to optimal MUAC cut-offs 1 | Thiness and severe thiness according to BMI Z-score | | Total |
| --- | --- | --- | --- |
| Yes | No |
| Yes | 58 | 94 | 152 |
| No | 8 | 296 | 304 |
| Total | 66 | 390 | 456 |

1Optimal cutoff will be estimated using the Youden index from our data

Table 3. Screening test result for BMI Z-score defined thinness with MUAC among adolescent females (n=396)

| Thiness and severe thiness according to optimal MUAC cut-offs 1 | Thiness and severe thiness according to BMI Z-score | | Total |
| --- | --- | --- | --- |
| Yes | No |
| Yes | 15 | 45 | 60 |
| No | 0 | 335 | 335 |
| Total | 15 | 380 | 395 |

1Optimal cutoff will be estimated using the Youden index from our data
